# Supplementary material
Source: PubMed Central journal article supplement (PMC3929374)
Supplement: NIHMS528041-supplement-ESI.pdf [file NIHMS528041-supplement-ESI.pdf]

## *Supporting Information*

### **Simple enrichment and analysis of plasma lysophosphatidic acids**

Jialu Wang,<sup>a</sup> Martha Sibrian-Vazquez,<sup>a</sup> Jorge O. Escobedo,<sup>a</sup> Mark Lowry,<sup>a</sup>  
Lei Wang,<sup>a</sup> Yu-Hsuan Chu,<sup>a</sup> Richard G. Moore,<sup>b</sup> and Robert M. Strongin,<sup>\*a</sup>

<sup>a</sup> *Department of Chemistry, Portland State University, Portland, OR 97201, USA.*  
*E-mail: [strongin@pdx.edu](mailto:strongin@pdx.edu); Tel: +1 503-725-9724*

<sup>b</sup> *Women and Infants Hospital, Brown University, 101 Dudley Street, Providence, RI 02905, USA.;*  
*E-mail: [RMoore@wihri.org](mailto:RMoore@wihri.org); Tel: +1 401-453-7520*

## Table of Contents

|                                                                                                                                           | <b>Page</b> |
|-------------------------------------------------------------------------------------------------------------------------------------------|-------------|
| <b>Fig. S1.</b> Mass spectra of phospholipids mixture in negative mode.....                                                               | S3          |
| <b>Fig. S2.</b> Mass spectra of phospholipids mixture in positive mode.....                                                               | S3          |
| <b>Fig. S3.</b> Mass spectra of plasma extract in negative mode.....                                                                      | S4          |
| <b>Fig. S4.</b> Mass spectra of plasma extract in positive mode.....                                                                      | S4          |
| <b>Table S1.</b> Effect of column length on the resolution and theoretical plates for the separation of LPAs                              | S5          |
| <b>Table S2.</b> Effect of pH on the resolution and theoretical plates for the separation of LPAs.....                                    | S5          |
| <b>Table S3.</b> Resolution and theoretical plates for the final optimal conditions.....                                                  | S5          |
| <b>Table S4.</b> Results for LPA analysis in human plasma (donor B) using the HPLC post-column fluorescence and LC/ESI/MS/MS methods..... | S6          |
| <b>Table S5.</b> Results for LPA analysis in human plasma (donor C) using the HPLC post-column fluorescence and LC/ESI/MS/MS methods..... | S6          |
| <b>Table S6.</b> Results for LPA analysis in human plasma (donor D) using the HPLC post-column fluorescence and LC/ESI/MS/MS methods..... | S7          |
| <b>Table S7.</b> Results for LPA analysis in human plasma (donor E) using the HPLC post-column fluorescence and LC/ESI/MS/MS methods..... | S7          |

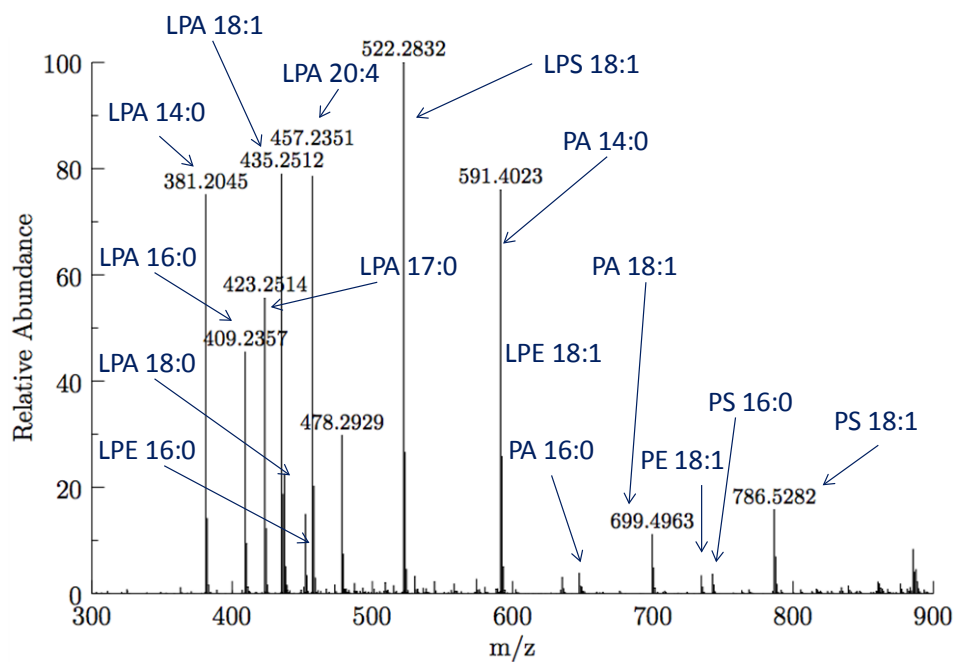

**Fig. S1** Mass spectra of phospholipids mixture in negative mode.

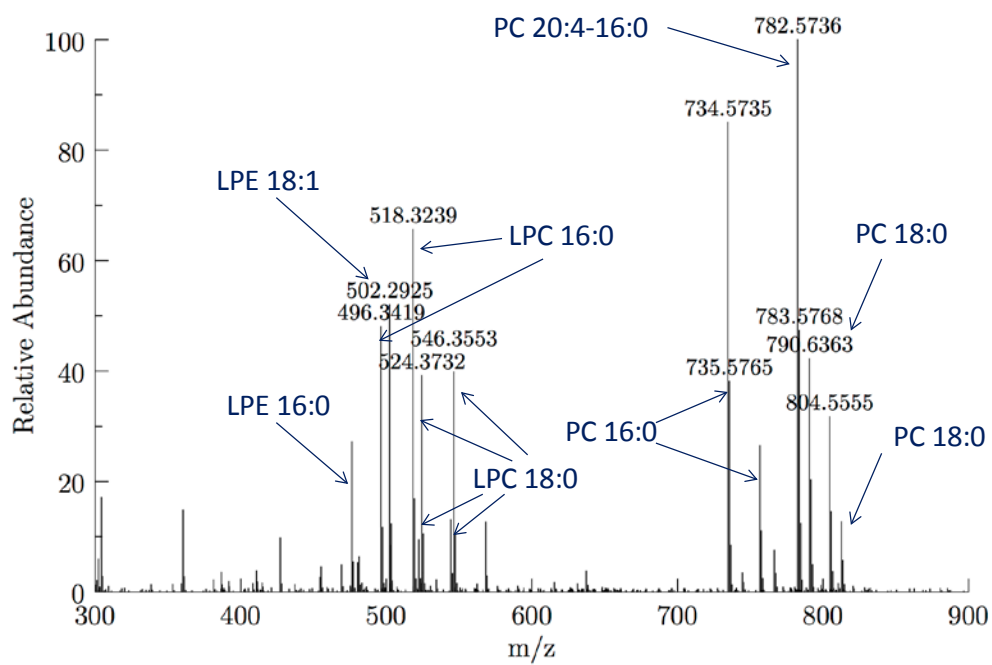

**Fig. S2** Mass spectra of phospholipids mixture in positive mode.

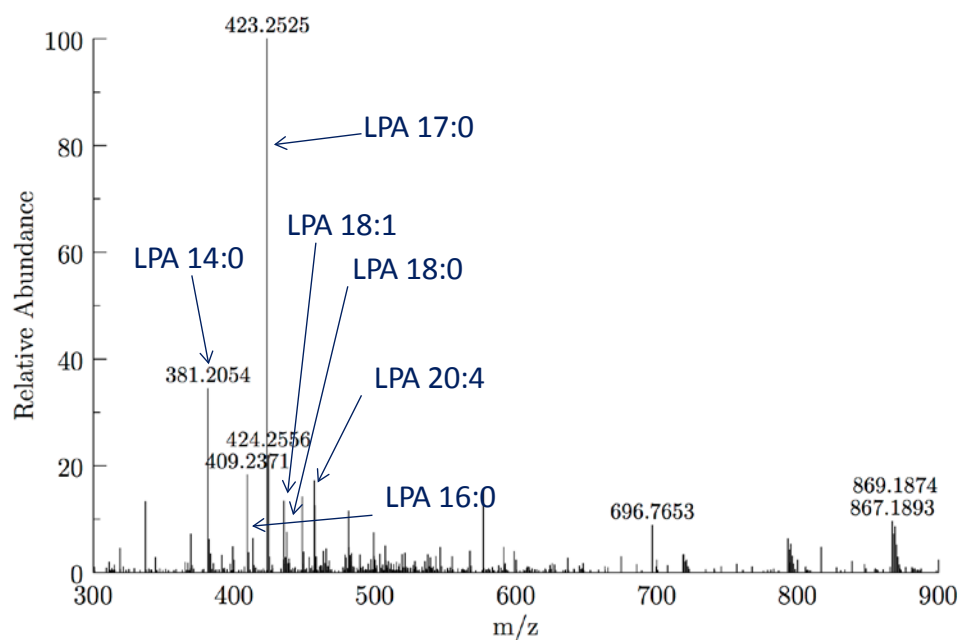

**Fig. S3** Mass spectra of plasma extract in negative mode.

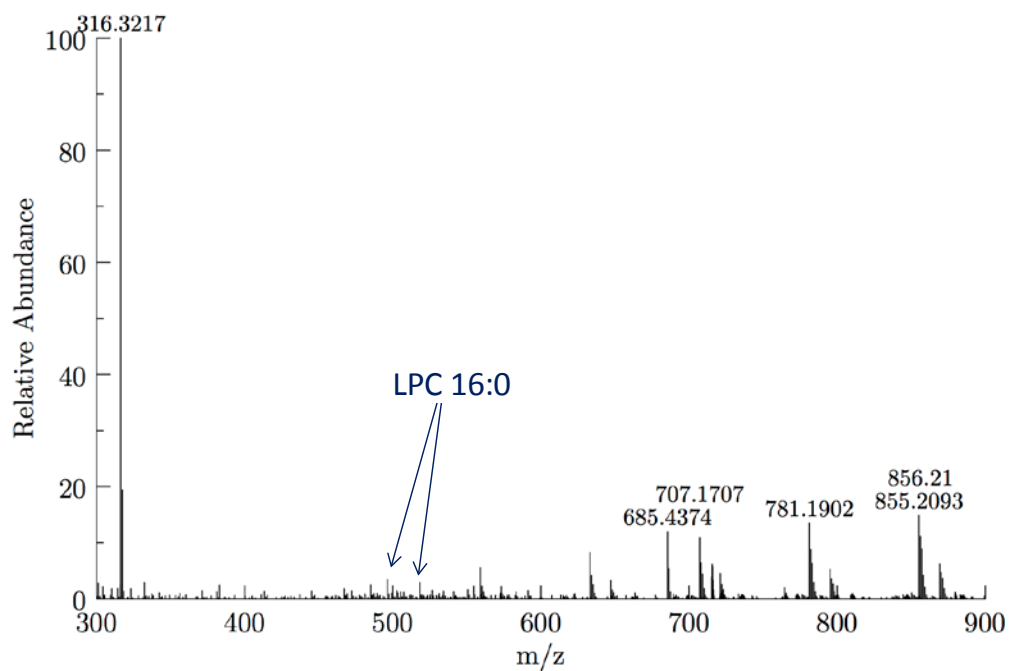

**Fig. S4** Mass spectra of plasma extract in positive mode.

**Table S1.** Effect of column length on the resolution and theoretical plates for the separation of LPAs.<sup>a</sup>

| column length (mm) | LPA 14:0                       |                      | LPA 20:4                       |                      | LPA 16:0                       |                      | LPA 18:1                       |                      | LPA 17:0                       |                      | LPA 18:0                       |
|--------------------|--------------------------------|----------------------|--------------------------------|----------------------|--------------------------------|----------------------|--------------------------------|----------------------|--------------------------------|----------------------|--------------------------------|
|                    | <i>N</i><br>( <i>RT</i> , min) | <i>R<sub>s</sub></i> | <i>N</i><br>( <i>RT</i> , min) |
| 100 <sup>b</sup>   | 312<br>(4.44)                  | 2.31                 | 192<br>(5.56)                  | 1.35                 | 1715<br>(6.53)                 | NA                   | NA<br>(7.89)                   | NA                   | 2712<br>(8.71)                 | 7.74                 | 3001<br>(11.87)                |
| 50 <sup>c</sup>    | 1280<br>(3.83)                 | 4.40                 | 1486<br>(4.72)                 | 3.52                 | 1917<br>(5.44)                 | 4.30                 | 1748<br>(6.61)                 | 2.57                 | 3416<br>(7.32)                 | 10.04                | 4361<br>(10.50)                |

<sup>a</sup> *R<sub>s</sub>* = resolution, *N* = theoretical plates, *RT* = retention time, NA = not applicable; LPA concentration: 80 μM; mobile phase: 4/1 MeOH/50 mM pH 3.0 phosphate buffer; injection volume: 5 μL.

<sup>b</sup> Discovery Bio wide pore (Supelco), C-8, 3 μm, 2.1 mm diameter. Flow rate: 0.20 mL/min.

<sup>c</sup> Luna (Phenomenex), C-8, 3 μm, 2.0 mm diameter. Flow rate: 0.20 mL/min.

**Table S2.** Effect of pH on the resolution and theoretical plates for the separation of LPAs.<sup>a</sup>

| pH  | LPA 14:0                       |                      | LPA 20:4                       |                      | LPA 16:0                       |                      | LPA 18:1                       |                      | LPA 17:0                       |                      | LPA 18:0                       |
|-----|--------------------------------|----------------------|--------------------------------|----------------------|--------------------------------|----------------------|--------------------------------|----------------------|--------------------------------|----------------------|--------------------------------|
|     | <i>N</i><br>( <i>RT</i> , min) | <i>R<sub>s</sub></i> | <i>N</i><br>( <i>RT</i> , min) |
| 3.0 | 996<br>(3.01)                  | 7.93                 | 1302<br>(4.69)                 | 3.14                 | 1040<br>(5.59)                 | 4.22                 | 1860<br>(6.92)                 | 1.65                 | 397<br>(7.78)                  | 5.66                 | 2176<br>(11.12)                |
| 2.5 | 1331<br>(3.16)                 | 9.71                 | 2000<br>(4.85)                 | 3.41                 | 1862<br>(5.61)                 | 4.82                 | 1625<br>(6.99)                 | 2.56                 | 1630<br>(7.88)                 | 7.57                 | 1828<br>(11.21)                |

<sup>a</sup> *R<sub>s</sub>* = resolution, *N* = theoretical plates, *RT* = retention time; LPA concentration is 5 μM; column: Luna C-8 50 × 2.0 mm; mobile phase: 7/2 MeOH/50 mM phosphate buffer; flow rate: 0.27 mL/min. Injection volume: 20 μL.

**Table S3.** Resolution and theoretical plates for the final optimal conditions.<sup>a</sup>

| LPA 14:0                       |                      | LPA 20:4                       |                      | LPA 16:0                       |                      | LPA 18:1                       |                      | LPA 17:0                       |                      | LPA 18:0                       |
|--------------------------------|----------------------|--------------------------------|----------------------|--------------------------------|----------------------|--------------------------------|----------------------|--------------------------------|----------------------|--------------------------------|
| <i>N</i><br>( <i>RT</i> , min) | <i>R<sub>s</sub></i> | <i>N</i><br>( <i>RT</i> , min) |
| 848<br>(3.96)                  | 6.25                 | 1149<br>(5.76)                 | 3.75                 | 2531<br>(6.84)                 | 5.71                 | 2105<br>(8.58)                 | 2.65                 | 1278<br>(9.72)                 | 8.28                 | 2635<br>(13.96)                |

<sup>a</sup> Column: Luna C-8 50 × 2.0 mm; LPA concentration is 10 μM; mobile phase: 16/5 MeOH/50 mM phosphate buffer; flow rate: 0.32 mL/min. Injection volume: 20 μL.

**Table S4** Results for LPA analysis in human plasma (donor B) using the HPLC post-column fluorescence and LC/ESI/MS/MS methods ( $n = 3$ ).

|           | non-spiked                         |                 | spiked with 0.5 $\mu\text{M}$ LPA  |                 | Recovery (%)        |                 |
|-----------|------------------------------------|-----------------|------------------------------------|-----------------|---------------------|-----------------|
|           | $\mu\text{M}$ (average, $\sigma$ ) |                 | $\mu\text{M}$ (average, $\sigma$ ) |                 |                     |                 |
|           | HPLC<br>Post-Column                | LC/ESI<br>MS/MS | HPLC<br>Post-Column                | LC/ESI<br>MS/MS | HPLC<br>Post-Column | LC/ESI<br>MS/MS |
| LPA 14:0  | 0.97(0.03)                         | 1.03(0.01)      | 1.43(0.04)                         | 1.45(0.03)      | 94                  | 82              |
| LPA 20:4  | 0.98(0.01)                         | 0.94(0.01)      | 1.41(0.02)                         | 1.43(0.01)      | 86                  | 100             |
| LPA 16:0  | 0.96(0.02)                         | 1.04(0.02)      | 1.45(0.03)                         | 1.60(0.03)      | 98                  | 112             |
| LPA 18:1  | 1.05(0.00)                         | 1.03(0.02)      | 1.47(0.02)                         | 1.55(0.02)      | 84                  | 102             |
| LPA 18:0  | 0.99(0.01)                         | 0.93(0.01)      | 1.56(0.04)                         | 1.47(0.01)      | 114                 | 110             |
| Total LPA | 4.96(0.04)                         | 4.97(0.04)      | 7.33(0.01)                         | 7.50(0.08)      | 95                  | 101             |

**Table S5** Results for LPA analysis in human plasma (donor C) using the HPLC post-column fluorescence and LC/ESI/MS/MS methods ( $n = 3$ ).

|           | non-spiked                         |                 | spiked with 0.5 $\mu\text{M}$ LPA  |                 | Recovery (%)        |                 |
|-----------|------------------------------------|-----------------|------------------------------------|-----------------|---------------------|-----------------|
|           | $\mu\text{M}$ (average, $\sigma$ ) |                 | $\mu\text{M}$ (average, $\sigma$ ) |                 |                     |                 |
|           | HPLC<br>Post-Column                | LC/ESI<br>MS/MS | HPLC<br>Post-Column                | LC/ESI<br>MS/MS | HPLC<br>Post-Column | LC/ESI<br>MS/MS |
| LPA 14:0  | 0.76(0.01)                         | 0.68(0.02)      | 1.25(0.02)                         | 1.21(0.04)      | 98                  | 106             |
| LPA 20:4  | 0.21(0.02)                         | 0.27(0.02)      | 0.64(0.01)                         | 0.67(0.05)      | 84                  | 80              |
| LPA 16:0  | 0.55(0.01)                         | 0.42(0.04)      | 1.05(0.05)                         | 0.97(0.04)      | 100                 | 112             |
| LPA 18:1  | 0.37(0.01)                         | 0.32(0.01)      | 0.96(0.05)                         | 0.79(0.06)      | 120                 | 96              |
| LPA 18:0  | 0.29(0.03)                         | 0.23(0.01)      | 0.79(0.01)                         | 0.79(0.02)      | 102                 | 112             |
| Total LPA | 2.18(0.02)                         | 1.91(0.09)      | 4.69(0.08)                         | 4.44(0.12)      | 100                 | 101             |

**Table S6** Results for LPA analysis in human plasma (donor D) using the HPLC post-column fluorescence and LC/ESI/MS/MS methods ( $n = 3$ ).

|           | non-spiked                   |                 | spiked with 0.5 $\mu$ M LPA  |                 | Recovery (%)        |                 |
|-----------|------------------------------|-----------------|------------------------------|-----------------|---------------------|-----------------|
|           | $\mu$ M (average, $\sigma$ ) |                 | $\mu$ M (average, $\sigma$ ) |                 |                     |                 |
|           | HPLC<br>Post-Column          | LC/ESI<br>MS/MS | HPLC<br>Post-Column          | LC/ESI<br>MS/MS | HPLC<br>Post-Column | LC/ESI<br>MS/MS |
| LPA 14:0  | 0.24(0.00)                   | 0.23(0.01)      | 0.65(0.02)                   | 0.68(0.02)      | 82                  | 92              |
| LPA 20:4  | 0.26(0.01)                   | 0.28(0.01)      | 0.67(0.01)                   | 0.65(0.04)      | 82                  | 74              |
| LPA 16:0  | 0.45(0.03)                   | 0.43(0.01)      | 0.88(0.02)                   | 0.83(0.04)      | 88                  | 80              |
| LPA 18:1  | 0.30(0.02)                   | 0.38(0.01)      | 0.87(0.02)                   | 0.85(0.03)      | 114                 | 94              |
| LPA 18:0  | 0.33(0.02)                   | 0.31(0.00)      | 0.85(0.02)                   | 0.82(0.01)      | 104                 | 102             |
| Total LPA | 1.57(0.03)                   | 1.63(0.03)      | 3.91(0.03)                   | 3.83(0.12)      | 94                  | 88              |

**Table S7** Results for LPA analysis in human plasma (donor E) using the HPLC post-column fluorescence and LC/ESI/MS/MS methods ( $n = 3$ ).

|           | non-spiked                   |                 | spiked with 0.5 $\mu$ M LPA  |                 | Recovery (%)        |                 |
|-----------|------------------------------|-----------------|------------------------------|-----------------|---------------------|-----------------|
|           | $\mu$ M (average, $\sigma$ ) |                 | $\mu$ M (average, $\sigma$ ) |                 |                     |                 |
|           | HPLC<br>Post-Column          | LC/ESI<br>MS/MS | HPLC<br>Post-Column          | LC/ESI<br>MS/MS | HPLC<br>Post-Column | LC/ESI<br>MS/MS |
| LPA 14:0  | 0.17(0.00)                   | 0.18(0.01)      | 0.61(0.02)                   | 0.60(0.00)      | 86                  | 84              |
| LPA 20:4  | 0.20(0.02)                   | 0.23(0.01)      | 0.75(0.01)                   | 0.77(0.01)      | 110                 | 110             |
| LPA 16:0  | 0.29(0.00)                   | 0.28(0.02)      | 0.71(0.00)                   | 0.76(0.01)      | 84                  | 96              |
| LPA 18:1  | 0.53(0.01)                   | 0.47(0.02)      | 0.97(0.02)                   | 1.03(0.00)      | 90                  | 112             |
| LPA 18:0  | 0.33(0.00)                   | 0.30(0.01)      | 0.84(0.01)                   | 0.89(0.00)      | 102                 | 118             |
| Total LPA | 1.52(0.02)                   | 1.45(0.05)      | 3.88(0.04)                   | 4.06(0.01)      | 94                  | 104             |
